# Supplementary material for: Successful implementation of an Enhanced Recovery After Surgery program shortens length of stay and improves postoperative pain, and bowel and bladder function after colorectal surgery
Source: PubMed Central journal article supplement (PMC4973042; doi:10.1186/s12871-016-0223-0), 2016-08-03
Supplement: 12871_2016_223_MOESM1_ESM.pdf [file 12871_2016_223_MOESM1_ESM.pdf]

| ANESTHESIA                                                          |                                                                                                                             |                                                                                                                                 | SURGERY                                                                                 | NURSING                                                                                                                                                                                                                                                                                                     | PATIENT                                                                                                                                                                                                                                                                                                                                                                              |                            |
|---------------------------------------------------------------------|-----------------------------------------------------------------------------------------------------------------------------|---------------------------------------------------------------------------------------------------------------------------------|-----------------------------------------------------------------------------------------|-------------------------------------------------------------------------------------------------------------------------------------------------------------------------------------------------------------------------------------------------------------------------------------------------------------|--------------------------------------------------------------------------------------------------------------------------------------------------------------------------------------------------------------------------------------------------------------------------------------------------------------------------------------------------------------------------------------|----------------------------|
| <b>DAYS B4</b>                                                      | <b>PREPARE</b>                                                                                                              | Phone Consult or Appointment                                                                                                    | Enter pre-op orders                                                                     |                                                                                                                                                                                                                                                                                                             | Enroll in MyChart                                                                                                                                                                                                                                                                                                                                                                    |                            |
|                                                                     |                                                                                                                             | Deliver instructions via MyChart or mail.                                                                                       | Patient Education in Clinic                                                             |                                                                                                                                                                                                                                                                                                             | Prehabilitation: Follow Exercise program in patient instructions                                                                                                                                                                                                                                                                                                                     |                            |
|                                                                     |                                                                                                                             |                                                                                                                                 | Stoma marking if applicable                                                             |                                                                                                                                                                                                                                                                                                             | Visit ERAS website for information                                                                                                                                                                                                                                                                                                                                                   |                            |
| <b>DOS. PRE-OP</b>                                                  | <b>MEDICATIONS</b>                                                                                                          | Pre-Op Warming. PIV. Crystalloid @ 30 ml/hr                                                                                     |                                                                                         | Please complete Pre-Op RN checklist 45 minutes prior to OR start time, then Green Light.<br><br>Apply Warming Blanket to patient. Teach IS.<br><br>IV Placed. Crystalloid started at 30ml/hr.<br><br>Gabapentin 600, APAP 1000, Diclofenac given once with water (<100ml). Antiemetics may also be ordered. | Nothing by mouth for eight hours before surgery except for a Boost Breeze completed 2 hours before coming to hospital.<br><br>Risks of surgery and anesthesia will be discussed. You will sign a consent for the procedure, and discuss the possibility of receiving blood products.<br><br>If there is any chance you might be pregnant, please discuss with surgery and anesthesia |                            |
|                                                                     |                                                                                                                             | <b>ANALGESICS</b>                                                                                                               | Gabapentin                                                                              |                                                                                                                                                                                                                                                                                                             |                                                                                                                                                                                                                                                                                                                                                                                      | 600mg once                 |
|                                                                     |                                                                                                                             | Acetaminophen                                                                                                                   | 1000mg once                                                                             |                                                                                                                                                                                                                                                                                                             |                                                                                                                                                                                                                                                                                                                                                                                      |                            |
|                                                                     |                                                                                                                             | Diclofenac (if eGFR>60)                                                                                                         | 100mg once                                                                              |                                                                                                                                                                                                                                                                                                             |                                                                                                                                                                                                                                                                                                                                                                                      |                            |
| <b>PONV</b>                                                         | Scopolamine                                                                                                                 | 1.5mg TD once                                                                                                                   |                                                                                         |                                                                                                                                                                                                                                                                                                             |                                                                                                                                                                                                                                                                                                                                                                                      |                            |
| <b>REGIONAL</b>                                                     | 30 minutes before start time, complete anesthesia assessment, go to Block Room, and place Thoracic Epidural placed at T8-10 |                                                                                                                                 | Consent checked, Site Marking, and 24-hr H&P completed 40 minutes before OR start time. |                                                                                                                                                                                                                                                                                                             |                                                                                                                                                                                                                                                                                                                                                                                      |                            |
| <b>INTRA-OP</b>                                                     | <b>SCIP-VTE</b>                                                                                                             | Heparin 5000units SQ X 1 after epidural placement                                                                               |                                                                                         |                                                                                                                                                                                                                                                                                                             |                                                                                                                                                                                                                                                                                                                                                                                      |                            |
|                                                                     |                                                                                                                             | Orogastric tube to low intermittent suction.                                                                                    |                                                                                         |                                                                                                                                                                                                                                                                                                             |                                                                                                                                                                                                                                                                                                                                                                                      |                            |
|                                                                     |                                                                                                                             | Fluids: NTE 2L unless EBL>300ml,                                                                                                |                                                                                         |                                                                                                                                                                                                                                                                                                             |                                                                                                                                                                                                                                                                                                                                                                                      |                            |
|                                                                     | <b>SCIP-10</b>                                                                                                              | Patient temperature must not drop below 36.0 C.                                                                                 |                                                                                         |                                                                                                                                                                                                                                                                                                             |                                                                                                                                                                                                                                                                                                                                                                                      |                            |
|                                                                     | <b>SCIP-Inf-1,2</b>                                                                                                         | Antibiotic: Ertapenem                                                                                                           | 1 gram IV x 1                                                                           |                                                                                                                                                                                                                                                                                                             |                                                                                                                                                                                                                                                                                                                                                                                      |                            |
|                                                                     | <b>MEDS</b>                                                                                                                 | Opioid of Choice: Hydromorphone or Morphine. Titrate to RR 12bpm at time of extubation.                                         |                                                                                         |                                                                                                                                                                                                                                                                                                             |                                                                                                                                                                                                                                                                                                                                                                                      |                            |
|                                                                     |                                                                                                                             | If Opioid-Tolerant, continue their opioid regimen intra-op. Start ketamine load and infusion. 0.2 mg/kg x 1. Then 2 mcg/kg/min. |                                                                                         |                                                                                                                                                                                                                                                                                                             |                                                                                                                                                                                                                                                                                                                                                                                      |                            |
|                                                                     |                                                                                                                             | <b>PONV</b>                                                                                                                     | Dexamethasone                                                                           |                                                                                                                                                                                                                                                                                                             |                                                                                                                                                                                                                                                                                                                                                                                      | 4mg IV x 1 after induction |
|                                                                     |                                                                                                                             | Metoclopramide 10mg IV X 1. Unless contraindicated.                                                                             |                                                                                         |                                                                                                                                                                                                                                                                                                             |                                                                                                                                                                                                                                                                                                                                                                                      |                            |
|                                                                     | <b>REGIONAL</b>                                                                                                             | Ondansetron                                                                                                                     | 4mg IV x 1                                                                              |                                                                                                                                                                                                                                                                                                             |                                                                                                                                                                                                                                                                                                                                                                                      |                            |
| <b>OR</b>                                                           | Thoracic Epidural 0.0625% Ropi + Fentanyl 2 mcg/ml @ 8 ml/hr                                                                |                                                                                                                                 |                                                                                         |                                                                                                                                                                                                                                                                                                             |                                                                                                                                                                                                                                                                                                                                                                                      |                            |
| Bilateral TAP Block. 20ml of Ropi 0.2%. Done prior to prep & drape. |                                                                                                                             |                                                                                                                                 |                                                                                         |                                                                                                                                                                                                                                                                                                             |                                                                                                                                                                                                                                                                                                                                                                                      |                            |
| <b>PACU</b>                                                         | <b>MEDICATION</b>                                                                                                           | Order opioid of Choice: Hydromorphone or Morphine. May start PCA.                                                               |                                                                                         | Hydromorphone or Morphine IV PRN Titrate to RR 10bpm                                                                                                                                                                                                                                                        |                                                                                                                                                                                                                                                                                                                                                                                      |                            |
|                                                                     |                                                                                                                             | Order Antiemetics                                                                                                               |                                                                                         |                                                                                                                                                                                                                                                                                                             |                                                                                                                                                                                                                                                                                                                                                                                      |                            |
|                                                                     | <b>REGIONAL</b>                                                                                                             | Thoracic Epidural 0.0625% Ropi + Fentanyl 2 mcg/ml @ 8 ml/hr                                                                    |                                                                                         | Thoracic Epidural 0.0625% Ropi + Fentanyl 2 mcg/ml @ 8 ml/hr                                                                                                                                                                                                                                                |                                                                                                                                                                                                                                                                                                                                                                                      |                            |
|                                                                     |                                                                                                                             |                                                                                                                                 | Order Postop Colorectal Surgery Orderset                                                |                                                                                                                                                                                                                                                                                                             |                                                                                                                                                                                                                                                                                                                                                                                      |                            |
|                                                                     |                                                                                                                             |                                                                                                                                 | Choose Famotidine (if GERD or steroids )                                                |                                                                                                                                                                                                                                                                                                             |                                                                                                                                                                                                                                                                                                                                                                                      |                            |
|                                                                     |                                                                                                                             |                                                                                                                                 | Choose Toradol if appropriate                                                           |                                                                                                                                                                                                                                                                                                             |                                                                                                                                                                                                                                                                                                                                                                                      |                            |

|                        |                    |                                                                                            |                            |                                                                                |                                                                            |                                                        |
|------------------------|--------------------|--------------------------------------------------------------------------------------------|----------------------------|--------------------------------------------------------------------------------|----------------------------------------------------------------------------|--------------------------------------------------------|
| <b>FLOOR/ICU POD 0</b> | <b>MEDICATIONS</b> | Gabapentin                                                                                 | 600mg PO QHS               |                                                                                | Vital Signs q 4H, I&O shift, weight daily, surgical incision care abdomen, | Out of bed 6 hours after surgery                       |
|                        |                    | Acetaminophen                                                                              | 1000mg IV q6H              |                                                                                | Out of bed 6 hours after surgery with assistance of Nursing                | Incentive Spirometry x10 q 1H                          |
|                        |                    | Toradol (if eGFR>60)                                                                       | 15mg IV q6H                |                                                                                | Encourage Incentive Spirometry x10 q 1H                                    | Limited Clears (<500 ml per shift)                     |
|                        |                    | If Opioid-Tolerant, continue ketamine infusion 2 mcg/kg/min and maintain daily opioid req. |                            |                                                                                | Foley Catheter to gravity.                                                 | Gum Chewing encouraged                                 |
|                        |                    | PCA HM 0.2/10/0 or Oxycodone PRN                                                           |                            |                                                                                | DVT Proph: Heparin 5kU SQ TID                                              |                                                        |
|                        | <b>REGI ONAL</b>   | Thoracic Epidural 0.0625% Ropi + Fentanyl 2 mcg/ml @ 8 ml/hr                               |                            |                                                                                |                                                                            |                                                        |
| <b>FLOOR/ICU POD 1</b> | <b>MEDICATIONS</b> | Gabapentin                                                                                 | 600mg PO QHS               | Evaluate IV Fluids and avoid hypervolemia                                      | Vital Signs q 4H, I&O shift, weight daily, surgical incision care abdomen, | Walking 5 times a day. At least first time with nurse. |
|                        |                    | Acetaminophen                                                                              | 1000mg IV/PO q6H           | Labs: CBC, Cr, BUN                                                             | Ambulation: OOB to chair (3hrs) BID<br>Ambulation 5 x per day              | Incentive Spirometry x10 q 1H                          |
|                        |                    | Toradol OR Diclofenac (eGFR)                                                               | 15mg IV q6H<br>50mg PO TID | Advance diet to unlimited clears if tolerated and reg food later if doing well | Encourage Incentive Spirometry x10 q 1H                                    | Unlimited Clears or Low residue diet                   |
|                        |                    | If Opioid-Tolerant, continue ketamine infusion 2 mcg/kg/min and maintain daily opioid req. |                            | Address Foley removal either today o POD 4 (if pelvic dissection)              | Remove Foley Catheter in AM                                                | Gum Chewing OK                                         |
|                        |                    | PCA HM 0.2/10/0 or Oxycodone PRN                                                           |                            | Address steroid taper if appropriate                                           | DVT Proph: Heparin 5000U SQ TID                                            |                                                        |
|                        | <b>REGI ONAL</b>   | Thoracic Epidural 0.0625% Ropi + Fentanyl 2 mcg/ml @ 8 ml/hr                               |                            |                                                                                | Unlimited clears or soft Diet. Gum chewing ok.                             |                                                        |
| <b>FLOOR/ICU POD 2</b> | <b>MEDICATIONS</b> | Gabapentin                                                                                 | 600mg PO QHS               | Evaluate IV Fluids and avoid hypervolemia                                      | Vital Signs q 4H, I&O shift, weight daily, surgical incision care abdomen, | Walking 5 times a day.                                 |
|                        |                    | Acetaminophen                                                                              | 1000mg IV/PO q6H           | Labs: CBC, Cr, BUN                                                             | Ambulation: OOB to chair (3hrs) BID<br>Ambulation 5 x per day              | Incentive Spirometry x15 q 1H                          |
|                        |                    | Toradol OR Diclofenac (eGFR)                                                               | 15mg IV q6H<br>50mg PO TID | Regular diet /Low residue for new ileostomies or newly working ileoanals       | Encourage Incentive Spirometry x10 q 1H                                    | Regular diet / Low residue diet                        |
|                        |                    | If Opioid-Tolerant, continue ketamine infusion 2 mcg/kg/min                                |                            | Nutrition Consultation for new ileostomies or new working ileoanal anastomosis |                                                                            |                                                        |
|                        |                    | If Opioid-Tolerant, continue their daily opioid requirement.                               |                            | Hold 6AM Heparin dose                                                          | DVT Proph: Heparin 5000U SQ TID                                            |                                                        |
|                        | <b>REGI ONAL</b>   | STOP epidural infusion at 6AM. Catheter to be removed at 8AM.                              |                            | Address steroid taper if appropriate                                           | Regular diet / Low residue diet                                            |                                                        |
